# Supplementary material
Source: MDPI journal article supplement (https://www.mdpi.com/2071-1050/13/21/12127)
Supplement: s1 [file s1 › sustainability-1383256-supplementary.pdf]

## Supplemental material S1: Interview

Identification: /\_\_\_\_/

*NumCode: First letter of the country (A for Algeria, M for Morocco, T for Tunisia and S for Spain)+number 01, 02, etc... for example: M01, M02...*

1. Full name: /\_\_\_\_\_/

2. Location or address: /\_\_\_\_\_/ (GPS location: \_\_\_\_\_)

3. Province: /\_\_\_\_\_/

4. Country: /\_\_\_\_\_/

5. Phone number: /\_\_\_\_\_/ (5a. email: \_\_\_\_\_)

6. Activity in the camel breeding sector (check all the stakeholder's activities):

- |                                                                 |                                         |                                                       |
|-----------------------------------------------------------------|-----------------------------------------|-------------------------------------------------------|
| <input type="checkbox"/> Breeder                                | <input type="checkbox"/> Feed supplier  | <input type="checkbox"/> Veterinary products supplier |
| <input type="checkbox"/> Veterinarian                           | <input type="checkbox"/> Slaughterhouse | <input type="checkbox"/> Dairy processing             |
| <input type="checkbox"/> Meat processing                        | <input type="checkbox"/> Butcher        | <input type="checkbox"/> Trader                       |
| <input type="checkbox"/> Administration                         | <input type="checkbox"/> Researcher     | <input type="checkbox"/> Selected (politic)           |
| <input type="checkbox"/> Representative of an association       | <input type="checkbox"/> Transporter    | <input type="checkbox"/> Tourism agency               |
| <input type="checkbox"/> Other activities (please state): _____ |                                         |                                                       |

7. Name the organization or company to which you belong: /\_\_\_\_\_/

8. What is your special field (if any): /\_\_\_\_\_/

9. Estimated volume produced by the activity: \_\_\_\_\_ (important to specify the unit :n° head sold/year ; n° litres of transformed milk ; etc... needs to be adapted according to the activity)

10. Where do you practice your activity:

- |                                                                            |                                        |                                        |
|----------------------------------------------------------------------------|----------------------------------------|----------------------------------------|
| <input type="checkbox"/> Douar/district                                    | <input type="checkbox"/> Province      | <input type="checkbox"/> Region/wilaya |
| <input type="checkbox"/> National                                          | <input type="checkbox"/> International |                                        |
| <input type="checkbox"/> Other. Precise (10a_zone_action_preciser) : _____ |                                        |                                        |

11. Do you practice any other activities?: ☐ Yes ☐ No

11a. If yes, which: /\_\_\_\_\_/

Stakeholder characteristics:

- A1\_Level of education: \_\_\_\_\_ A2\_Age : \_\_\_\_\_
- A3\_How long have you exercised this activity? \_\_\_\_ (in years)
- A4\_How many people do you employ? /\_\_\_\_/
- A5\_If you are a breeder, number of camels do you own? /\_\_\_\_/
- A6\_Length of transhumance: /\_\_\_\_/ month ; A7.Distance : \_\_\_\_\_ km
- A8\_Cultivated area ? /\_\_\_\_/ ha ; A9\_Main crops : \_\_\_\_\_ ;
- A10\_Surface area of the main crop or number of trees : \_\_\_\_\_ (A11. Comment)

Current situation:

Place in the horizontal relationship with peers

12. Do you have relationships with your peers ? : ☐ Yes ☐ No

13. What kind of relationships (you may have more than one type of relationship at the same time) :

- ☐ Friendly/family
- ☐ Professional (exchange of information; product flows; etc.)
- ☐ Contractual (member of a same organization: association; cooperative; etc.))
- ☐ Other.: \_\_\_\_\_ (13a\_ type of relationship)

14. Type of exchange:

| 14. Type of product                               | 14a. Description of the exchange | 14b. Check the box if the product is a gift? to peers | 14c. Check the box if received from peers |
|---------------------------------------------------|----------------------------------|-------------------------------------------------------|-------------------------------------------|
| Animal                                            |                                  | <input type="checkbox"/>                              | <input type="checkbox"/>                  |
| Intermediate products (medicines, livestock feed) |                                  | <input type="checkbox"/>                              | <input type="checkbox"/>                  |
| Service (work)                                    |                                  | <input type="checkbox"/>                              | <input type="checkbox"/>                  |
| Information (experience)                          |                                  | <input type="checkbox"/>                              | <input type="checkbox"/>                  |
| Knowledge (training).                             |                                  | <input type="checkbox"/>                              | <input type="checkbox"/>                  |
| Credit/loan                                       |                                  | <input type="checkbox"/>                              | <input type="checkbox"/>                  |
| Other                                             |                                  | <input type="checkbox"/>                              | <input type="checkbox"/>                  |

15. How many peers in all does the interviewer communicate with? /\_\_\_\_/

16. How often are you in contact with your peers?

- ☐ Every day ☐ At least once a week ☐ 1-3 times a month ☐ 2-3 times a year
- ☐ Other: \_\_\_\_\_ (16a\_relation\_freq\_preciser)

17. Average distance between you and your peers: \_\_\_\_\_km

18. Score the degree of confidence you have in the relationship (from 1 to 10) ?

(1: no confidence / 10: very high confidence) /\_\_\_\_/

19. What benefits do you get from this relationship (in terms of knowledge, competence) to improve your activity ?:

/\_\_\_\_\_/

20. Have you observed any changes in the relationships with your peers over the last 10 years? ☐ Yes ☐ No

21. If yes, what were the positive changes? /\_\_\_\_\_/

22. If yes, what were the negative changes? /\_\_\_\_\_/

23. What are your expectations (objectives) in collaborating with your peers? /\_\_\_\_\_/

24. What are the main obstacles to good cooperation with your peers? /\_\_\_\_\_/

25. What form of collaboration would you like? (Form of professional organization desired) /\_\_\_\_\_/

26. What are the main obstacles to establishing this professional organization? /\_\_\_\_\_/

**Place of the stakeholder in the vertical relationships (other than the peers)**

27. With which stakeholder of the camel sector do you have relationships? (check **the 3 main stakeholders**)

- ☐ Breeder ☐ Feed supplier ☐ Veterinary products supplier
- ☐ Veterinarian ☐ Slaughterhouse ☐ Dairy processing
- ☐ Meat processing ☐ Butcher ☐ Trader
- ☐ Administration ☐ Researcher ☐ Selected (politic)
- ☐ Representative of an association ☐ Transporter ☐ Tourism agency
- ☐ Others (6a\_activite\_preciser) : \_\_\_\_\_

Table S1. Detail the type of relationship you have with all the actors

| (T11) Stakeholders                   | (T12) Type of relationship<br>(1) | (T13) has given what?<br>(2) | (T13s) has received what?<br>(2) | (T14) Frequency of the contacts<br>(3) | (T15) Degree of confidence in the relationship | (T16) Appreciation of the functioning of this link? (5) | (T17) Evolution of this relation over the last 10 years? (6) |
|--------------------------------------|-----------------------------------|------------------------------|----------------------------------|----------------------------------------|------------------------------------------------|---------------------------------------------------------|--------------------------------------------------------------|
| Breeders                             |                                   |                              |                                  |                                        |                                                |                                                         |                                                              |
| Feed supplier                        |                                   |                              |                                  |                                        |                                                |                                                         |                                                              |
| Veterinary products                  |                                   |                              |                                  |                                        |                                                |                                                         |                                                              |
| Veterinarian                         |                                   |                              |                                  |                                        |                                                |                                                         |                                                              |
| Slaughterhouse                       |                                   |                              |                                  |                                        |                                                |                                                         |                                                              |
| Dairy processor                      |                                   |                              |                                  |                                        |                                                |                                                         |                                                              |
| Meat processor                       |                                   |                              |                                  |                                        |                                                |                                                         |                                                              |
| Butcher                              |                                   |                              |                                  |                                        |                                                |                                                         |                                                              |
| Merchant                             |                                   |                              |                                  |                                        |                                                |                                                         |                                                              |
| Administration                       |                                   |                              |                                  |                                        |                                                |                                                         |                                                              |
| Researcher                           |                                   |                              |                                  |                                        |                                                |                                                         |                                                              |
| Elected representatives (politician) |                                   |                              |                                  |                                        |                                                |                                                         |                                                              |
| Representative of association        |                                   |                              |                                  |                                        |                                                |                                                         |                                                              |
| Transporter                          |                                   |                              |                                  |                                        |                                                |                                                         |                                                              |
| Tourism agency                       |                                   |                              |                                  |                                        |                                                |                                                         |                                                              |

(1) **Type of relation:** 1. Friend/family; 2. Professional (exchange of information; product flows; etc.) 3. Contractual (member of the same organization: association; cooperative; other); 4. Others. Please add to the table.

(2) **Object of the relation:** 1. Animal flows; 2. Intermediate product flows (medicines, livestock feed) Which one? /\_\_\_\_\_/; 3. Service flows (work); 4. Information and experience: /\_\_\_\_\_/; 5. Knowledge (training): /\_\_\_\_\_/; 6. Credit/loan; 7. Other/\_\_\_\_\_/

(3) **Frequency of contacts:** 1. Every day 2. At least once a week; 3. 2-3 times/month ; 4. 2-3 times/year; 5. Other. Precise in the table

(4) **Degree of confidence (from 1 to 10):** 1: no confidence - 10: very high confidence

(5) **Appreciation of the functioning:** 1. Good ; 2. Medium ; 3. Bad ; 4. Other, add to the table.

(6) **Change in the relationship:** 1. Getting worse; 2. Stable; 3. Improving; 4. Other, add to the table

28. With which stakeholders do you think your relationships and functioning are the **most efficient**? :

- |                                                                 |                                         |                                                       |
|-----------------------------------------------------------------|-----------------------------------------|-------------------------------------------------------|
| <input type="checkbox"/> Breeder                                | <input type="checkbox"/> Feed supplier  | <input type="checkbox"/> Veterinary products supplier |
| <input type="checkbox"/> Vet                                    | <input type="checkbox"/> Slaughterhouse | <input type="checkbox"/> Dairy processing             |
| <input type="checkbox"/> Meat processor                         | <input type="checkbox"/> Butcher        | <input type="checkbox"/> Trader                       |
| <input type="checkbox"/> Administration                         | <input type="checkbox"/> Researcher     | <input type="checkbox"/> Elected representative       |
| <input type="checkbox"/> Representative of an association       | <input type="checkbox"/> Transporter    | <input type="checkbox"/> Tourism agency               |
| <input type="checkbox"/> Others: (6a_activite_preciser) : _____ |                                         |                                                       |

29. What are the main reasons the relationship functions well?

/ \_\_\_\_\_ /

30. With which stakeholders do you think your relationships and functioning are the **least efficient**? :

- |                                                                 |                                         |                                                       |
|-----------------------------------------------------------------|-----------------------------------------|-------------------------------------------------------|
| <input type="checkbox"/> Breeder                                | <input type="checkbox"/> Feed supplier  | <input type="checkbox"/> Veterinary products supplier |
| <input type="checkbox"/> Veterinarian                           | <input type="checkbox"/> Slaughterhouse | <input type="checkbox"/> Dairy processing             |
| <input type="checkbox"/> Meat processor                         | <input type="checkbox"/> Butcher        | <input type="checkbox"/> Trader                       |
| <input type="checkbox"/> Administration                         | <input type="checkbox"/> Researcher     | <input type="checkbox"/> Elected representative       |
| <input type="checkbox"/> Representative of an association       | <input type="checkbox"/> Transporter    | <input type="checkbox"/> Tourism agency               |
| <input type="checkbox"/> Others: (6a_activite_preciser) : _____ |                                         |                                                       |

31. What are the main reasons for this bad functioning?

/ \_\_\_\_\_ /

#### EXPECTATIONS OF THE VALUE CHAIN

31. What do you consider to be the main obstacles to the development of a professional organization in the camel sector, at the scale of your area of operation ? (rank from the most important to the least important)

1. / \_\_\_\_\_ / (31a\_Contrainte\_1)
2. / \_\_\_\_\_ / (31b\_Contrainte\_2)
3. / \_\_\_\_\_ / (31c\_Contrainte\_3)

32. What would do you consider the best options to improve the functioning of the professional organization of the camel sector? (rank from the most important to the less important)

1. / \_\_\_\_\_ / (32a\_Option\_1)
2. / \_\_\_\_\_ / (32b\_Option\_2)
3. / \_\_\_\_\_ / (32c\_Option\_3)

33. What are the main obstacles to the development of the above options?

1. / \_\_\_\_\_ / (33a\_Frein\_1)
2. / \_\_\_\_\_ / (33b\_Frein\_2)
3. / \_\_\_\_\_ / (33c\_Frein\_3)

34. What role would you be willing to play to help improve the organization of the sector? / \_\_\_\_\_ /

35. Does your position with your peers or within the chain allow you to have a driving role in the future organization of the sector? / \_\_\_\_\_ /

36. Do you think that you can positively influence this organization from your network ? ☐ Yes ☐ No

37. If yes, how ? / \_\_\_\_\_ /

38. Do you have expectations in terms of transnational collaboration?

☐ Yes

☐ No

39. If yes what are they? \_\_\_\_\_
